# Supplementary material for: Cheminformatics-Based Study Identifies Potential Ebola VP40 Inhibitors
Source: MDPI journal article supplement (doi:10.3390/ijms24076298), 2023-03-27
Supplement: s1 [file s1]

## Supplementary Information

### Content

Table S1: Predicted physicochemical and biological properties of some shortlisted compounds using SwissADME.

Table S2: Anti-EBOV inhibition efficiency of the shortlisted compounds using Anti-Ebola.

Table S3: Interacting residues of the VP40 with nilotinib and the potential lead compounds during molecular dynamics simulations.

Figure S1: Potential energy plot of the VP40 after subjecting the protein to energy minimization using CHARMM-36 and OPLS force fields.

Figure S2: Protein-ligand interaction map of VP40 in complex with: (a) ZINC000034518176; (b) ZINC000095485942; (c) NANPDB2933; (d) ZINC000014089759; (e) ZINC000085545967; (f) ZINC000085568136; (g) ZINC000095912717; (h) doramectin; (i) ledipasvir; and (j) abamectin.

Figure S3: RMSF plot of the EBOV VP40-ligand complexes after 100 ns MD simulations.

Figure S4: Hydrogen bond analysis plot of the EBOV VP40-ligand complexes after 100 ns MD simulations.

Figure S5: Per-residue energy decomposition plots of the various complexes showing the energy contributions of each amino acid residue for (a) VP40-nilotinib, (b) VP40-ZINC000034518176, (c) VP40-ZINC000095485942, (d) VP40-ZINC000085531689, (e) VP40-ZINC000014089759, (f) VP40-ZINC000085568136, and (g) VP40-ZINC000095912717 complexes.

### Supplementary Tables

Table S1. Predicted physicochemical and biological properties of some shortlisted compounds (the remaining TCM compounds) using SwissADME.

| Compound         | Binding Energy (kcal/mol) | Molecular Weight (g/mol) | TPSA (Å <sup>2</sup> ) | LogP | ESOL Solubility Class | GI Absorption | BBB Permeant | Pgp substrate |
|------------------|---------------------------|--------------------------|------------------------|------|-----------------------|---------------|--------------|---------------|
| ZINC000100822646 | -8.4                      | 494.49                   | 135.29                 | 4.28 | Poorly soluble        | Low           | No           | No            |
| ZINC000100822774 | -8.4                      | 494.49                   | 135.29                 | 3.92 | Poorly soluble        | Low           | No           | No            |
| ZINC000103580868 | -8.4                      | 576.93                   | 18.46                  | 3.92 | Poorly soluble        | Low           | No           | No            |
| ZINC000014587019 | -8.3                      | 456.49                   | 99.38                  | 4.22 | Poorly soluble        | High          | No           | No            |
| ZINC000033829866 | -8.3                      | 452.67                   | 43.37                  | 5.93 | Poorly soluble        | Low           | No           | No            |
| ZINC000095910238 | -8.3                      | 568.87                   | 32.76                  | 4.66 | Poorly soluble        | Low           | No           | No            |
| ZINC000103580368 | -8.3                      | 526.53                   | 137.96                 | 0.81 | Soluble               | High          | No           | Yes           |
| ZINC000004098631 | -8.2                      | 440.49                   | 79.15                  | 5.02 | Poorly soluble        | High          | No           | No            |
| ZINC000033833171 | -8.2                      | 456.7                    | 57.53                  | 5.45 | Poorly soluble        | High          | No           | No            |
| ZINC000070454883 | -8.2                      | 427.62                   | 58.56                  | 3.54 | Moderately soluble    | High          | Yes          | Yes           |
| ZINC000095911414 | -8.2                      | 416.42                   | 108.74                 | 3.72 | Moderately soluble    | High          | No           | No            |
| ZINC000033833170 | -8.1                      | 456.7                    | 57.53                  | 5.48 | Poorly soluble        | High          | No           | No            |
| ZINC000070451048 | -8.1                      | 530.65                   | 119.49                 | 2.97 | Moderately soluble    | High          | No           | No            |
| ZINC000085530490 | -8.1                      | 568.65                   | 124.8                  | 3.35 | Moderately soluble    | High          | No           | Yes           |

|                  |      |        |        |      |                    |      |     |     |
|------------------|------|--------|--------|------|--------------------|------|-----|-----|
| ZINC000085592933 | -8.1 | 582.64 | 117.84 | 4.32 | Poorly soluble     | Low  | No  | No  |
| ZINC000095910059 | -8.1 | 532.67 | 111.52 | 2.98 | Moderately soluble | High | No  | Yes |
| ZINC000095911347 | -8.1 | 526.53 | 137.96 | 1.37 | Soluble            | High | No  | Yes |
| ZINC000095911794 | -8.1 | 436.58 | 69.92  | 6.03 | Poorly soluble     | Low  | No  | No  |
| ZINC000095912227 | -8.1 | 442.72 | 40.46  | 6.2  | Poorly soluble     | Low  | No  | No  |
| ZINC000103554058 | -8.1 | 526.53 | 137.96 | 3.68 | Poorly soluble     | High | No  | Yes |
| ZINC000005765422 | -8   | 442.72 | 40.46  | 6.22 | Poorly soluble     | Low  | No  | No  |
| ZINC000014587014 | -8   | 456.49 | 99.38  | 4.18 | Poorly soluble     | High | No  | No  |
| ZINC000014828729 | -8   | 437.53 | 68.23  | 3.72 | Moderately soluble | High | Yes | Yes |
| ZINC000031155872 | -8   | 484.5  | 124.8  | 2.06 | Soluble            | High | No  | Yes |
| ZINC000049888703 | -8   | 592.68 | 72.86  | 5    | Poorly soluble     | High | No  | No  |
| ZINC000070451272 | -8   | 462.62 | 52.6   | 5.68 | Moderately soluble | High | No  | No  |
| ZINC000070454761 | -8   | 442.67 | 57.53  | 5.15 | Moderately soluble | High | No  | No  |
| ZINC000095912718 | -8   | 526.57 | 114.43 | 2.37 | Moderately soluble | High | No  | Yes |
| ZINC000095913855 | -8   | 446.62 | 75.99  | 3.57 | Moderately soluble | High | Yes | Yes |

Table S2. Anti-EBOV inhibition efficiency of the shortlisted compounds using Anti-Ebola.

| Compound                           | Inhibition Efficiency |                       |                        |                       |
|------------------------------------|-----------------------|-----------------------|------------------------|-----------------------|
|                                    | Random Forest         |                       | Support Vector Machine |                       |
|                                    | pIC <sub>50</sub>     | IC <sub>50</sub> (μM) | pIC <sub>50</sub>      | IC <sub>50</sub> (μM) |
| <b>AfroDB</b>                      |                       |                       |                        |                       |
| ZINC000034518176                   | 5.41                  | 3.86                  | 5.5                    | 3.14                  |
| ZINC000095485942                   | 5.53                  | 2.93                  | 4.69                   | 20.51                 |
| <b>NANPDB</b>                      |                       |                       |                        |                       |
| NANPDB2933 (2-hydroxyseneganolide) | 5.15                  | 2                     | 4.3                    | 2                     |
| <b>TCM</b>                         |                       |                       |                        |                       |
| ZINC000085531689                   | 5.96                  | 1.1                   | 7.05                   | 0.09                  |
| ZINC000014089759                   | 5.42                  | 3.83                  | 5.52                   | 3.03                  |
| ZINC000085545967                   | 5.46                  | 3.48                  | 5.48                   | 3.35                  |
| ZINC000085568136                   | 6                     | 0.99                  | 7.26                   | 0.05                  |
| ZINC000095912717                   | 5.61                  | 2.45                  | 5.12                   | 7.62                  |
| ZINC000014089743                   | 5.42                  | 3.83                  | 5.52                   | 3.01                  |
| ZINC000101564200                   | 5.54                  | 2.9                   | 4.89                   | 12.82                 |
| ZINC000085504890                   | N/A                   | N/A                   | N/A                    | N/A                   |
| ZINC000095909661                   | 5.87                  | 1.36                  | 7.65                   | 0.02                  |
| ZINC000070454124                   | 5.76                  | 1.75                  | 6.36                   | 0.44                  |
| ZINC000085530485                   | 5.81                  | 1.54                  | 5.35                   | 4.45                  |
| ZINC000095911418                   | 5.62                  | 2.4                   | 5.88                   | 1.33                  |
| ZINC000100822646                   | 5.54                  | 2.9                   | 6.06                   | 0.87                  |
| ZINC000100822774                   | 5.67                  | 2.14                  | 6.45                   | 0.36                  |
| ZINC000103580868                   | 5.56                  | 2.79                  | 5.23                   | 5.93                  |
| ZINC000014587019                   | 5.81                  | 1.56                  | 6.74                   | 0.18                  |

|                                         |      |         |      |         |
|-----------------------------------------|------|---------|------|---------|
| ZINC000033829866                        | 5.49 | 3.24    | 5.63 | 2.36    |
| ZINC000095910238                        | 5.73 | 1.88    | 6.89 | 0.13    |
| ZINC000103580368                        | 5.59 | 2.56    | 5    | 10.12   |
| ZINC000004098631                        | 5.75 | 1.77    | 6.68 | 0.21    |
| ZINC000033833171                        | 5.51 | 3.07    | 5.98 | 1.04    |
| ZINC000070454883                        | 5.52 | 3.01    | 5.64 | 2.3     |
| ZINC000095911414                        | 5.44 | 3.63    | 4.68 | 20.94   |
| ZINC000033833170                        | 5.45 | 3.56    | 5.73 | 1.87    |
| ZINC000070451048                        | N/A  | N/A     | N/A  | N/A     |
| ZINC000085530490                        | 5.83 | 1.47    | 5.38 | 4.13    |
| ZINC000085592933                        | 5.77 | 1.71    | 7.44 | 0.04    |
| ZINC000095910059                        | 5.45 | 3.58    | 5.46 | 3.45    |
| ZINC000095911347                        | 5.59 | 2.56    | 5    | 10.12   |
| ZINC000095911794                        | 5.57 | 2.67    | 6.42 | 0.38    |
| ZINC000095912227                        | 5.45 | 3.58    | 5.78 | 1.65    |
| ZINC000103554058                        | 5.59 | 2.56    | 5    | 10.12   |
| ZINC000005765422                        | 5.45 | 3.58    | 5.76 | 1.75    |
| ZINC000014587014                        | 5.79 | 1.63    | 7.26 | 0.06    |
| ZINC000014828729                        | 5.02 | 9.62    | 4.3  | 49.77   |
| ZINC000031155872                        | 5.49 | 3.23    | 5.34 | 4.61    |
| ZINC000049888703                        | 5.71 | 1.97    | 6.53 | 0.3     |
| ZINC000070451272                        | 5.63 | 2.36    | 5.7  | 2       |
| ZINC000070454761                        | 5.01 | 9.77    | 4.86 | 13.93   |
| ZINC000095912718                        | 5.52 | 3.03    | 5.04 | 9.06    |
| ZINC000095913855                        | 5.54 | 2.88    | 5.66 | 2.18    |
| <b>Approved</b>                         |      |         |      |         |
| Doramectin                              | 5.74 | 1.83    | 7.61 | 0.02    |
| Ledipasvir                              | 5.81 | 0       | 6.66 | 0       |
| Avermectin B1 (Abamectin)               | 6.02 | 0       | 7.59 | 0       |
| Elbasvir                                | 5.78 | 1.67    | 7.14 | 0.07    |
| Venetoclax (ABT-199, GDC-0199)          | N/A  | N/A     | N/A  | N/A     |
| Revefenacin                             | 0    | 1000000 | 0    | 1000000 |
| Glecaprevir                             | 5.77 | 1.71    | 6.44 | 0.36    |
| Velpatasvir                             | 5.68 | 2.11    | 6.73 | 0.19    |
| Hederacoside C (Kalopanaxsaponin B)     | N/A  | N/A     | N/A  | N/A     |
| Paritaprevir (ABT-450)                  | 5.86 | 1.38    | 7.17 | 0.07    |
| Selamectin                              | 5.9  | 1.25    | 6.81 | 0.16    |
| Pibrentasvir (ABT-530)                  | N/A  | N/A     | N/A  | N/A     |
| Enzastaurin (LY317615)                  | 5.91 | 1.22    | 7.22 | 0.06    |
| Deforolimus (MK-8669, AP23573, MK-8669) | 5.57 | 2.72    | 6.98 | 0.1     |
| Nafarelin Acetate                       | 0    | 0       | 0    | 0       |
| Danoprevir (ITMN-191)                   | 5.93 | 0       | 7.35 | 0       |
| Tolvaptan (OPC-41061, Samsca)           | 5.66 | 2.17    | 6.13 | 0.74    |
| Fangchinoline                           | 5.78 | 1.68    | 6.66 | 0.22    |
| Eltrombopag                             | 5.91 | 0       | 6.98 | 0       |
| Lanatoside C                            | 5.67 | 0       | 7.21 | 0       |
| Nilotinib (AMN-107)                     | 5.71 | 1.96    | 6.07 | 0.85    |

|                                  |      |         |      |         |
|----------------------------------|------|---------|------|---------|
| Ivermectin (Stromectol)          | 5.91 | 1.22    | 6.53 | 0.3     |
| Glycyrrhizin (Glycyrrhizic Acid) | 5.75 | 0       | 7.33 | 0       |
| Sennoside A                      | 5.49 | 0       | 6.53 | 0       |
| Sennoside B                      | 5.49 | 0       | 6.53 | 0       |
| Cepharanthine                    | 5.99 | 1.03    | 6.92 | 0.12    |
| Efonidipine                      | N/A  | N/A     | N/A  | N/A     |
| Daclatasvir Digydrochloride      | 5.59 | 0       | 5.36 | 0       |
| BMS-927711 (BHV-3000)            | 0    | 1000000 | 0    | 1000000 |
| Irinotecan (CPT-11)              | 0    | 1000000 | 0    | 1000000 |

Table S3. Interacting residues of the VP40 with nilotinib and the potential lead compounds during molecular dynamics simulations.

| Compound         | Time (ns) | Interacting Residues                                             |                                                                                   |
|------------------|-----------|------------------------------------------------------------------|-----------------------------------------------------------------------------------|
|                  |           | Hydrogen Bonds [Bond Length (Å)]                                 | Hydrophobic contacts                                                              |
| ZINC000034518176 | 0         | Gly139 (3.02)                                                    | Phe36, Asn43, Pro47, arg134, Asn136, Arg137, and Leu138                           |
|                  | 25        | -                                                                | Asn43, Gly44, Asp45, Thr123, Arg134, and Asn136                                   |
|                  | 50        | -                                                                | Phe36, Asn43, Gly44, Thr123, and Arg134                                           |
|                  | 75        | -                                                                | Phe36, Asn43, Gly44, Thr46, Thr121, Thr123, Asn136, and Leu138                    |
|                  | 100       | -                                                                | Gly44, Thr123, and Arg134                                                         |
| ZINC000095485942 | 0         | Thr129 (3.13) and Asn130 (2.97)                                  | Pro131, Gln159, Glu160, Pro165, Leu168, Pro169, and Gln170                        |
|                  | 25        | -                                                                | Gln159, Glu160, Leu163, Pro164, Pro165, Val166, and Phe172                        |
|                  | 50        | -                                                                | Met89, Pro93, Pro164, and Val166                                                  |
|                  | 75        | -                                                                | Arg2, Gln91, Pro93, Phe161, Val162, Leu163, Pro164, and Pro165                    |
|                  | 100       | Met1 (2.52 and 2.78)                                             | Arg2, Gln91, Pro93, Ile94, Trp95, Phe161, Val162, Leu163, Pro164, and Pro165      |
| NANPDB2933       | 0         | Gln159 (2.97), Gln167 (3.33 and 3.1), and Gln170 (2.74)          | Ala128, Thr129, Pro131, Glu160, Pro165, Val166, and Leu168                        |
|                  | 25        | His124 (2.91), Val166 (3.03 and 3.28), and Leu168 (3.25)         | Met89, Ala128, Thr129, Asn130, Pro131, Glu160, Pro164, Pro165, Gln167, and Phe172 |
|                  | 50        | Val166 (2.88 and 3.25), Leu168 (3.2 and 3.34), and Gln170 (2.85) | His124, Ala128, Thr129, Asn130, Pro131, Glu160, Pro164, Pro165, and Phe172        |

|                  |     |                                                                               |                                                                                        |
|------------------|-----|-------------------------------------------------------------------------------|----------------------------------------------------------------------------------------|
|                  | 75  | Asn130 (2.85), Val166 (2.82 and 3.18),<br>Leu168 (3.29), and Gln170 (2.97)    | Met89, His124, Ala128, Thr129, Pro131,<br>Pro164, Pro165, Gln167, and Phe172           |
|                  | 100 | Asn130 (3.05), Val166 (2.79 and 3.31), and<br>Gln170 (2.73)                   | His124, Ala128, Thr129, Pro131, Val133,<br>Glu160, Leu163, Leu168, and Phe172          |
| ZINC000085531689 | 0   | Asn130 (2.79, 3.16, 3.24), Gln159 (3.02),<br>Glu160 (2.53), and Pro169 (2.63) | Gln167, Leu168, Gln170, and Phe172                                                     |
|                  | 25  | Gln167 (2.85)                                                                 | Lys127, Ala128, Thr129, Leu168, and Gln170                                             |
|                  | 50  | Gln167 (2.66) and Gln170 (3.21)                                               | Leu88, Leu168, and Pro169                                                              |
|                  | 75  | Leu168 (2.87) and Gln170 (2.95)                                               | Pro165, Val166, and Gln167                                                             |
|                  | 100 | Glu160 (2.95) and Gln167 (3.32)                                               | Phe161, Leu163, Pro164, Pro165, and Val166                                             |
| ZINC000014089759 | 0   | Pro39 (2.75)                                                                  | Tyr18, Pro19, Arg21, Asn23, and Lys127                                                 |
|                  | 25  | -                                                                             | Arg3, Val4, Tyr13, Tyr18, Pro19, Asn130,<br>Leu158, and Phe161                         |
|                  | 50  | -                                                                             | Arg3, Tyr13, Tyr18, and Pro19                                                          |
|                  | 75  | -                                                                             | Pro11, Glu12, and Tyr13                                                                |
|                  | 100 | -                                                                             | -                                                                                      |
| ZINC000085568136 | 0   | -                                                                             | Val42, Asn43, Gly44, Asp45, Gly84, Lys127,<br>Ala128, and Tyr171                       |
|                  | 25  | Gln170 (3.28)                                                                 | Val42, Asn43, Gly44, Asp45, His124, Gly126,<br>Lys127, Ala128, and Tyr171              |
|                  | 50  | Gln170 (3.23)                                                                 | Val42, Lys127, Ala128, Thr19, and Tyr171                                               |
|                  | 75  | -                                                                             | Asn43, Gly44, Gly126, Lys127, Ala128,<br>Thr129, Gln170, and Tyr171                    |
|                  | 100 | -                                                                             | Asn43, Gly126, Lys127, Ala128, Thr129,<br>Gln170, and Tyr171                           |
| ZINC000095912717 | 0   | Thr129 (2.9), Asn130 (2.94), and Gln170<br>(2.71)                             | Lys127, Ala128, Pro131, Gln159, Glu160,<br>Pro164, Pro165, Val166, Gln167, and Leu168  |
|                  | 25  | Asn130 (3.01) and Leu168 (3.33)                                               | Pro131, Gln159, Glu160, Leu163, Pro164,<br>Pro165, Val166, Gln167, and Gln170          |
|                  | 50  | Met1 (3.13) and Gln159 (2.82)                                                 | Glu160, Pro164, Pro165, Val166, Gln167, and<br>Leu168                                  |
|                  | 75  | Leu168 (2.99)                                                                 | Thr129, Asn130, Pro131, Gln159, Pro165,<br>Val166, and Gln170                          |
|                  | 100 | Arg3 (2.8)                                                                    | Asn130, Pro131, Gln159, Glu160, Pro165,<br>Val166, Gln167, and Gln170                  |
| Nilotinib        | 0   | -                                                                             | Tyr13, Tyr18, Pro19, Val20, arg21, Pro39,<br>Glu40, Val42, Lys127                      |
|                  | 25  | -                                                                             | Val20, Thr38, Glu40, ser41, Val42, Phe125,<br>and Ala156                               |
|                  | 50  | -                                                                             | Pro19, Val20, Thr38, Glu40, Ser41, Val42,<br>Asn43, Phe125, Gly126, Asn130, and Leu132 |
|                  | 75  | -                                                                             | Val20, Arg21, Glu40, and Val42                                                         |
|                  | 100 | -                                                                             | -                                                                                      |

## Supplementary Figures

### Potential Energies

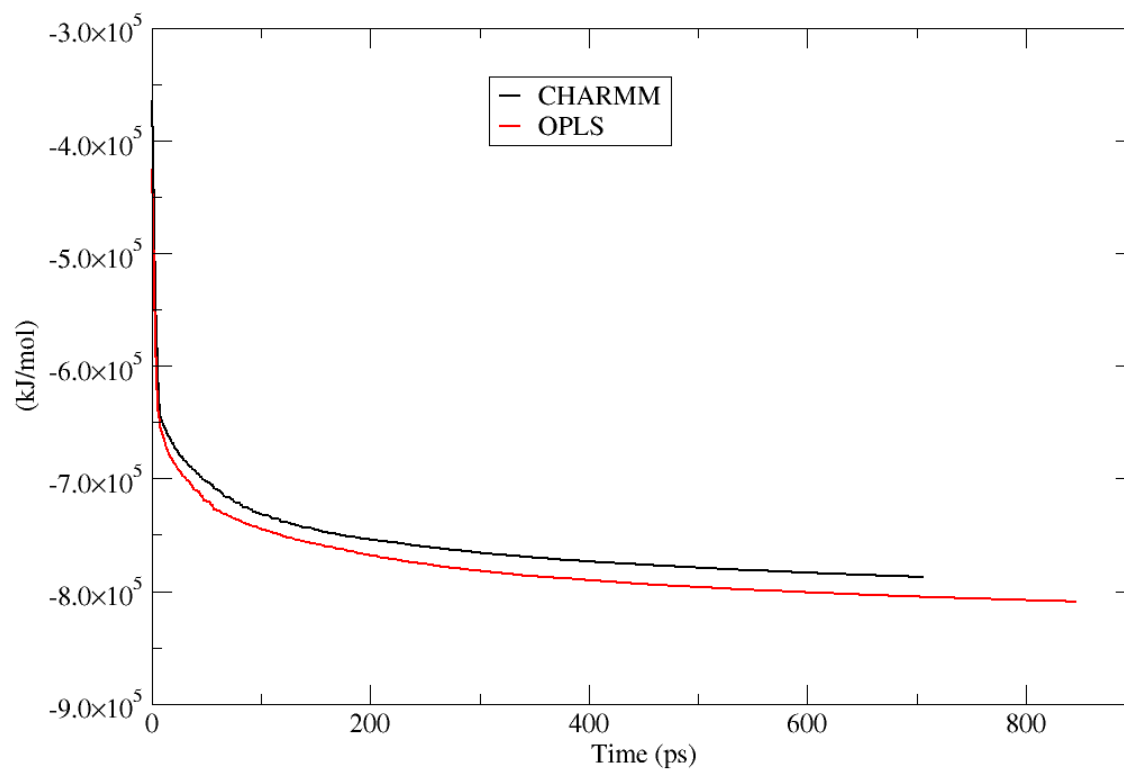

**Figure S1.** Potential energy plot of the VP40 after subjecting the protein to energy minimization using CHARMM-36 and OPLS force fields.

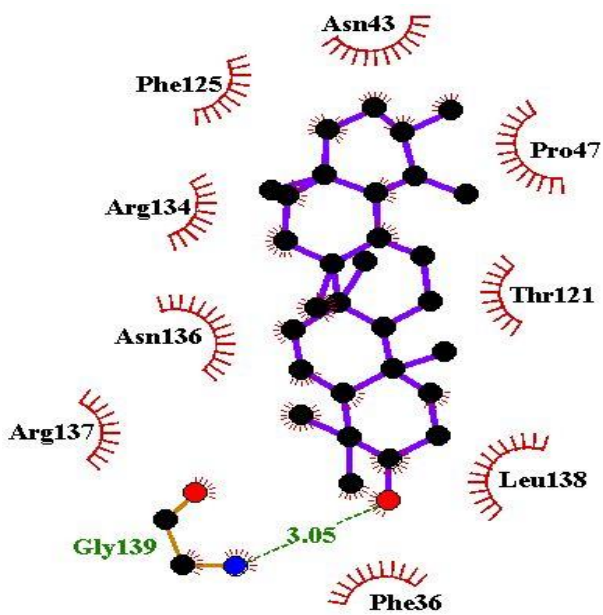

(a)

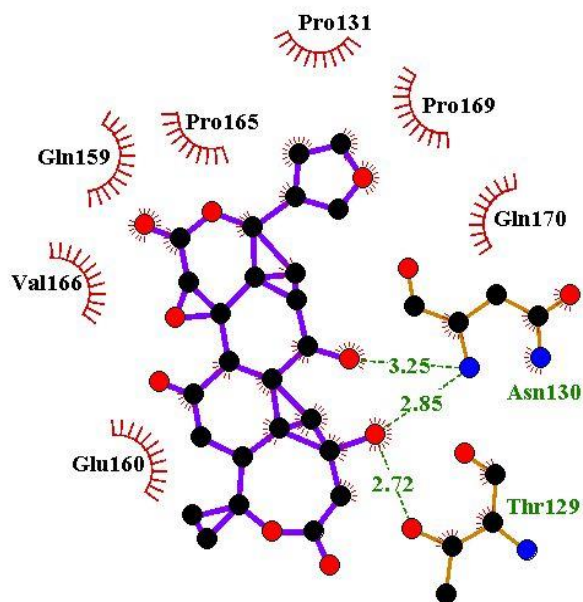

(b)

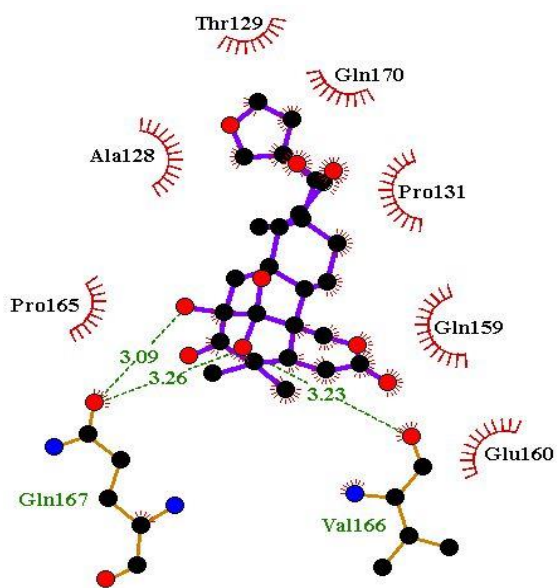

(c)

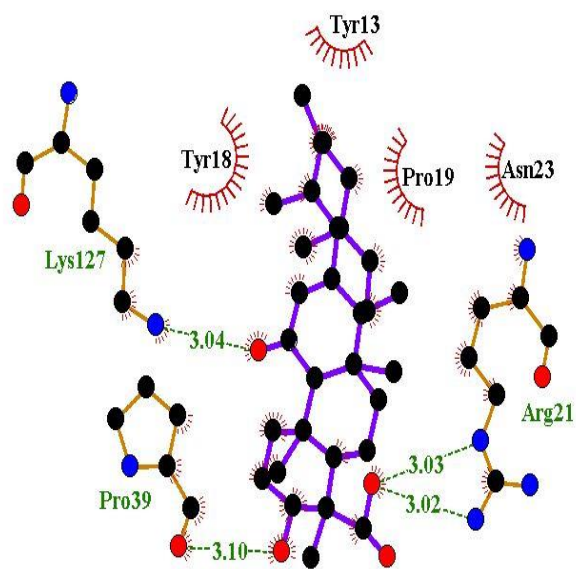

(d)

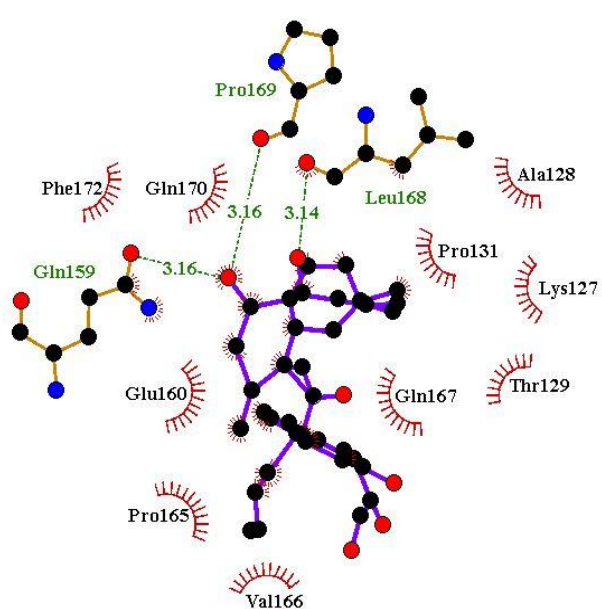

(e)

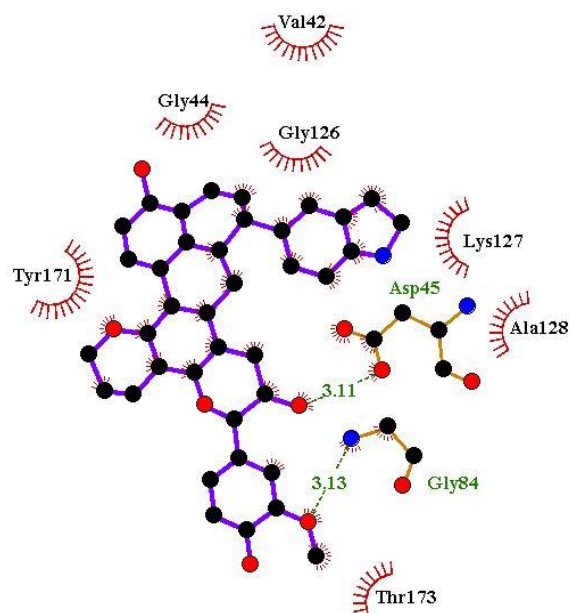

(f)

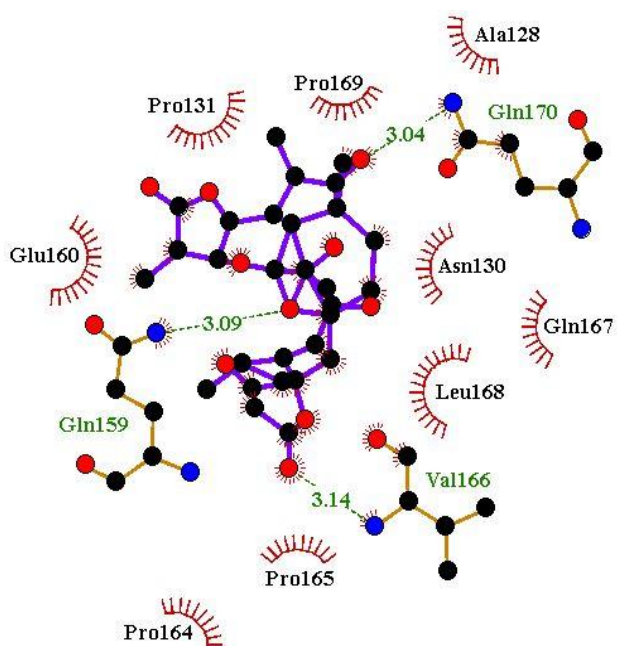

(g)

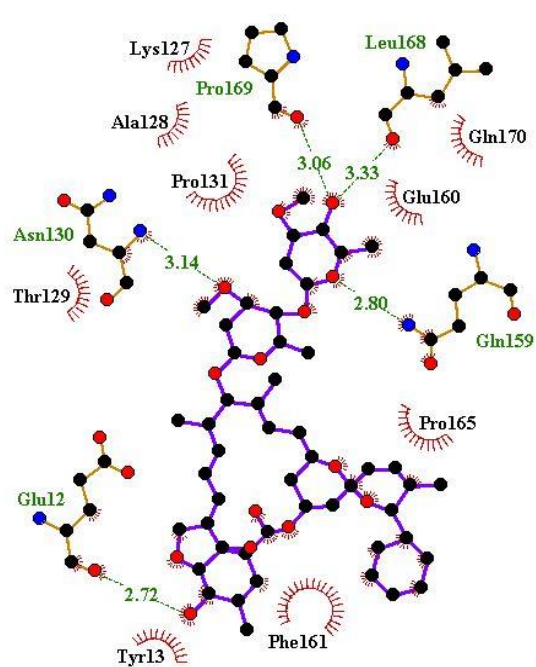

(h)

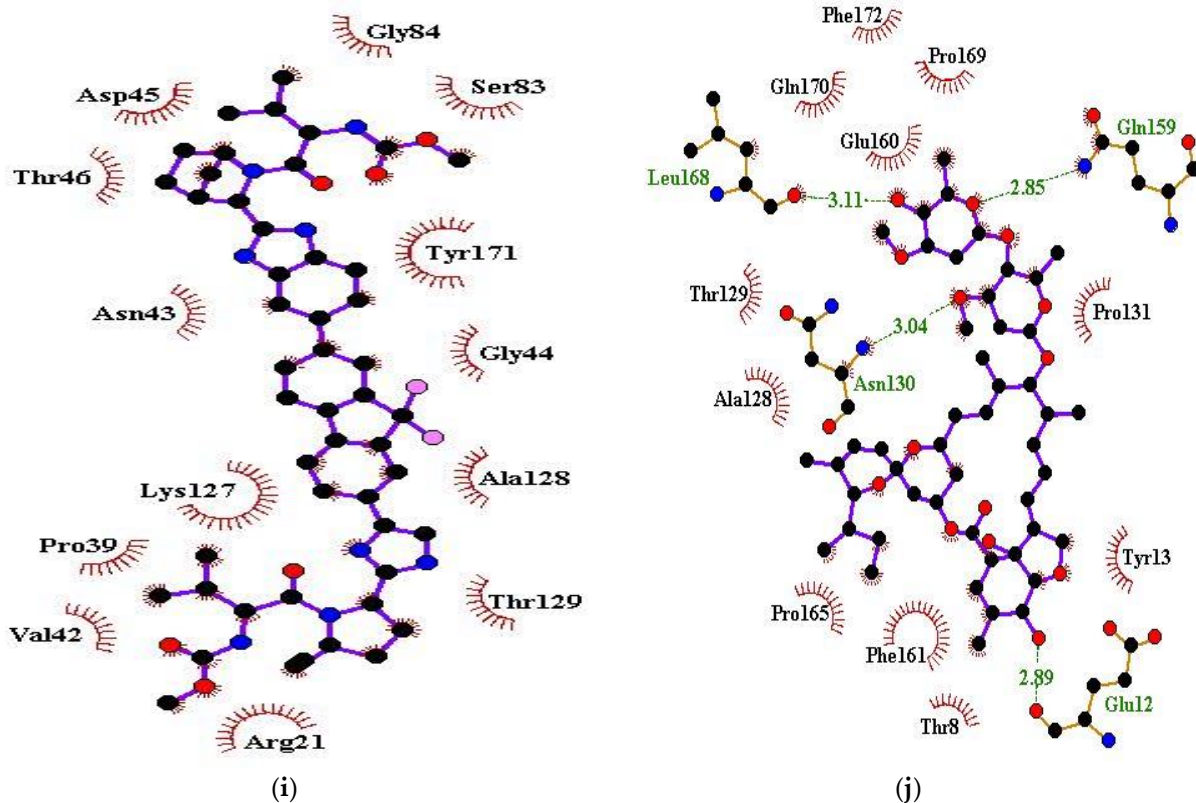

**Figure S2.** Protein-ligand interaction map of VP40 in complex with: (a) ZINC000034518176; (b) ZINC000095485942; (c) NANPDB2933; (d) ZINC000014089759; (e) ZINC000085545967; (f) ZINC000085568136; (g) ZINC000095912717; (h) doramectin; (i) ledipasvir; and (j) abamectin. The green dotted lines indicate hydrogen bonds while the red arcs with spikes represent hydrophobic interactions.

## RMS fluctuation

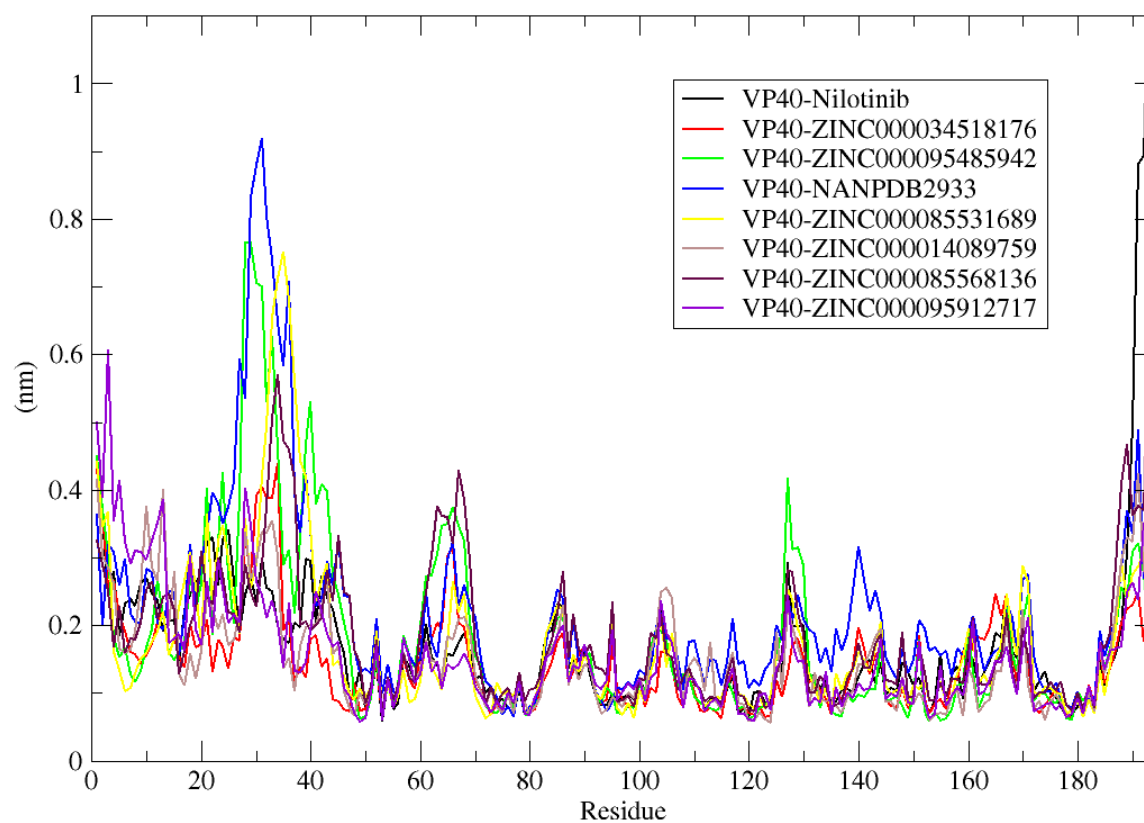

**Figure S3.** RMSF plot of the EBOV VP40-ligand complexes after 100 ns MD simulations. The VP40-nilotinib, VP40-ZINC000034518176, VP40-ZINC000095485942, VP40-NANPDB2933, VP40-ZINC000085531689, VP40-ZINC000014089759, VP40-ZINC000085568136, and VP40-ZINC000095912717 complexes are colored black, red, green, blue, yellow, brown, maroon, and violet, respectively.

## Hydrogen Bonds

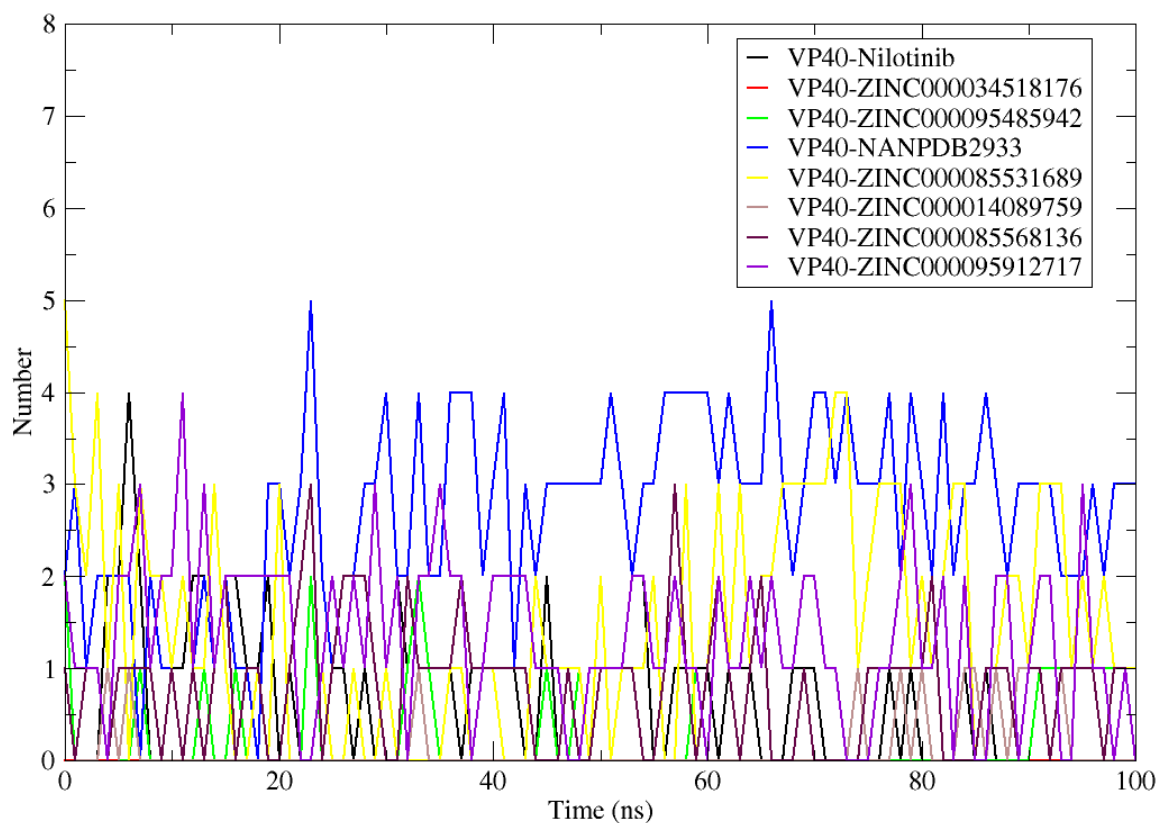

**Figure S4.** Hydrogen bond analysis plot of the EBOV VP40-ligand complexes after 100 ns MD simulations. The VP40-nilotinib, VP40-ZINC000034518176, VP40-ZINC000095485942, VP40-NANPDB2933, VP40-ZINC000085531689, VP40-ZINC000014089759, VP40-ZINC000085568136, and VP40-ZINC000095912717 complexes are colored black, red, green, blue, yellow, brown, maroon, and violet, respectively.

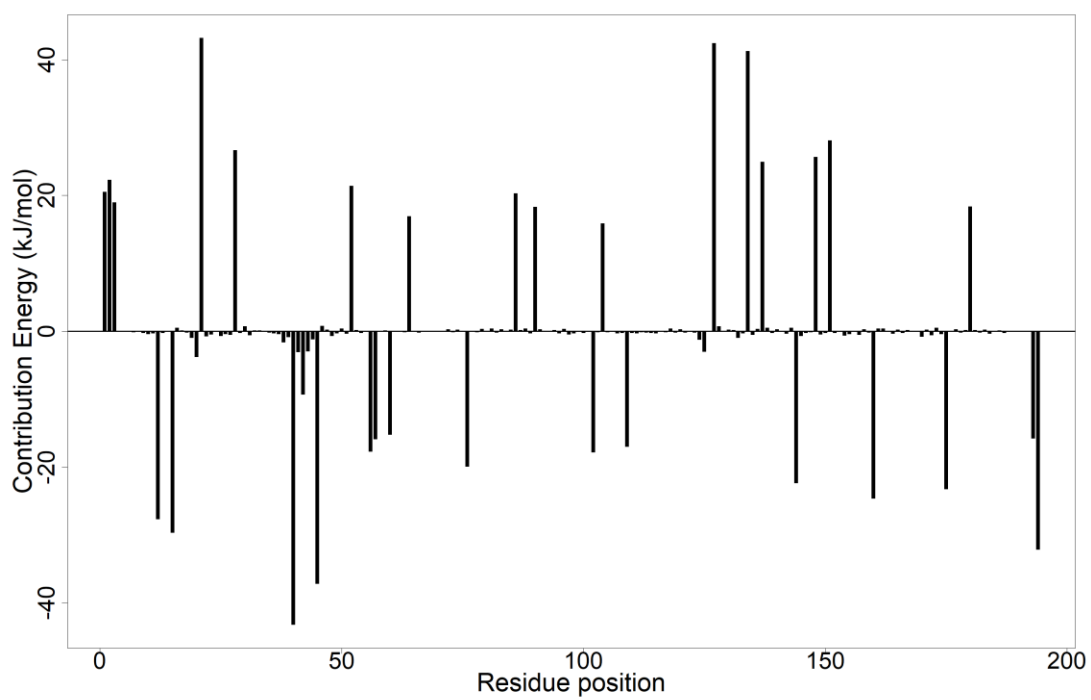

(a)

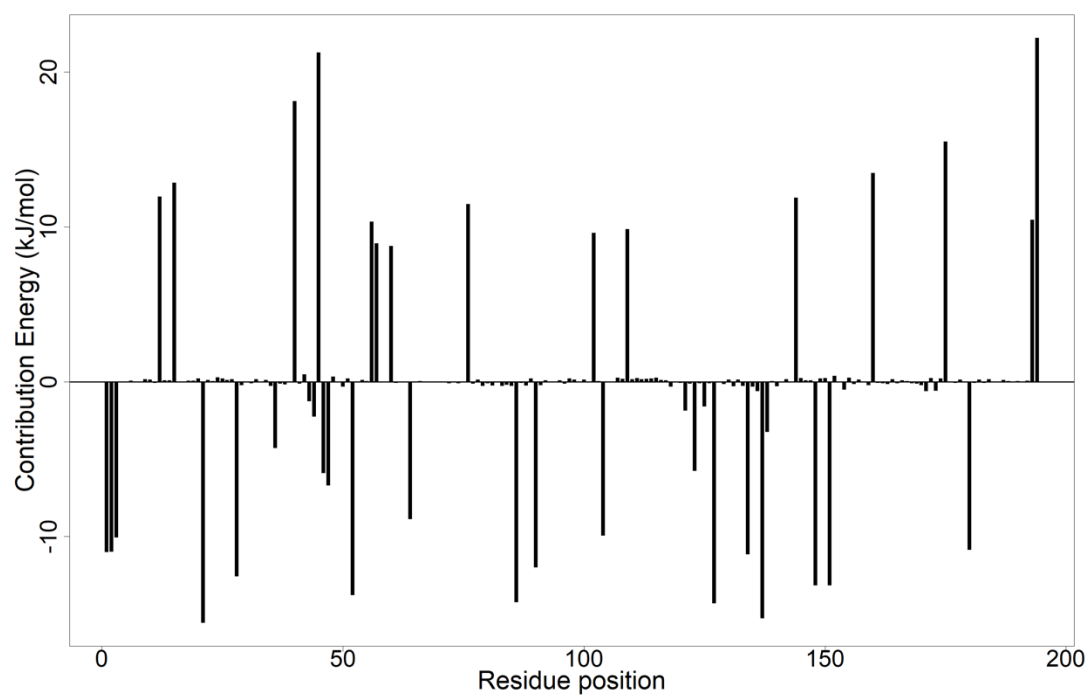

(b)

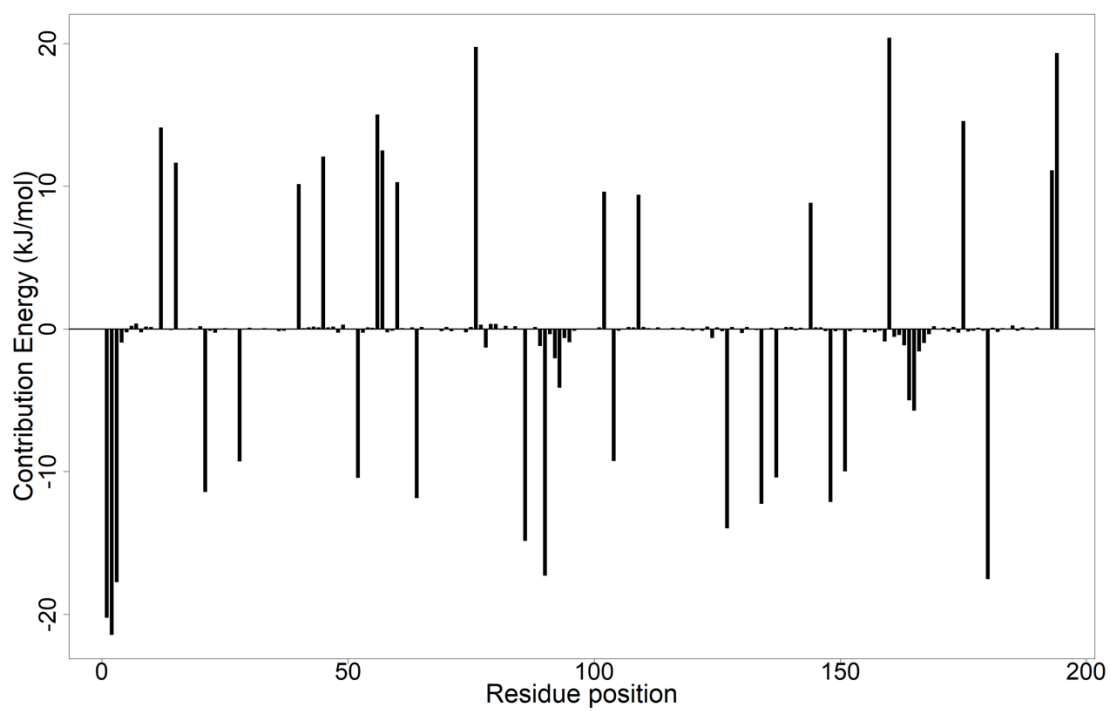

(c)

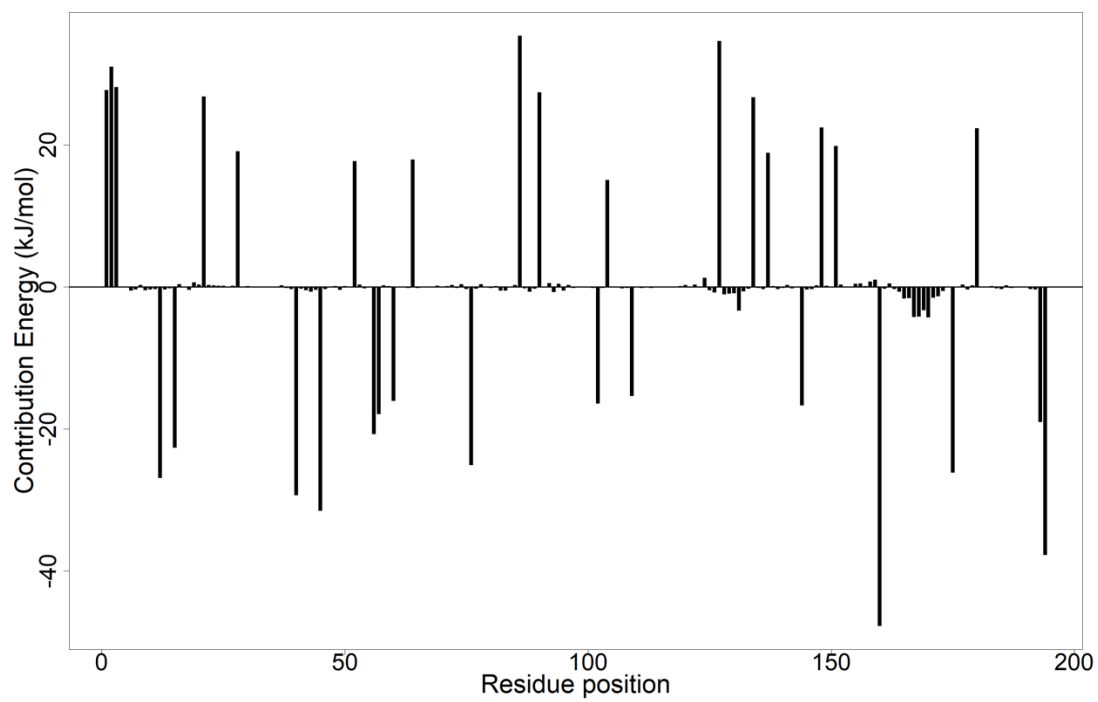

(d)

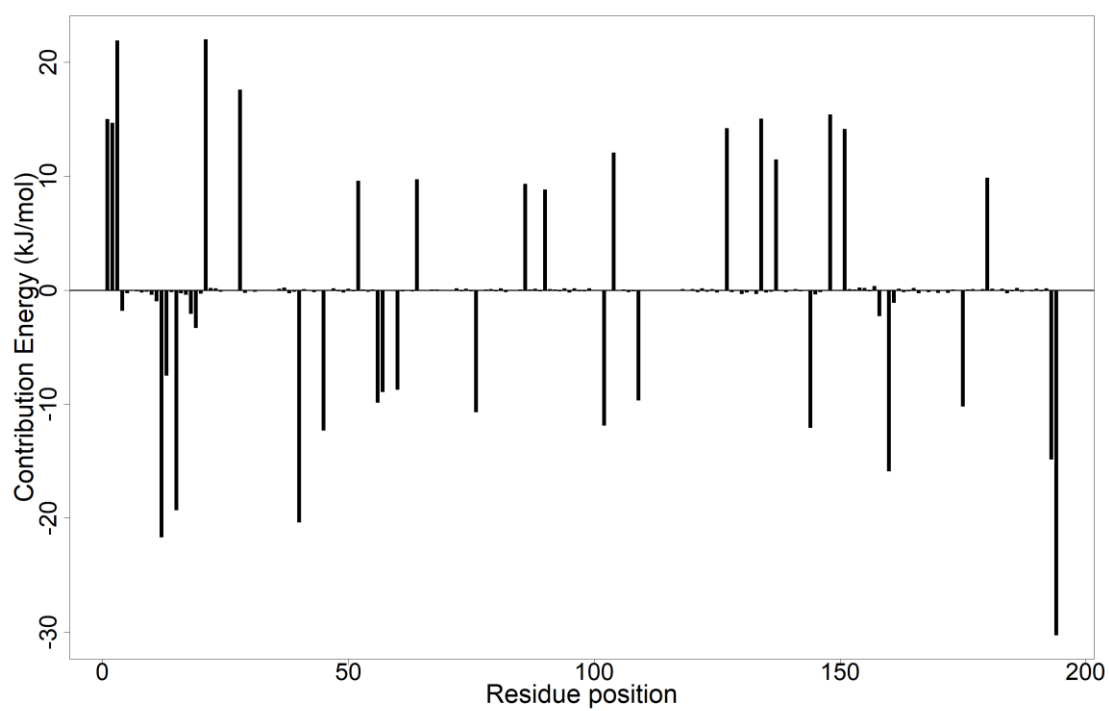

(e)

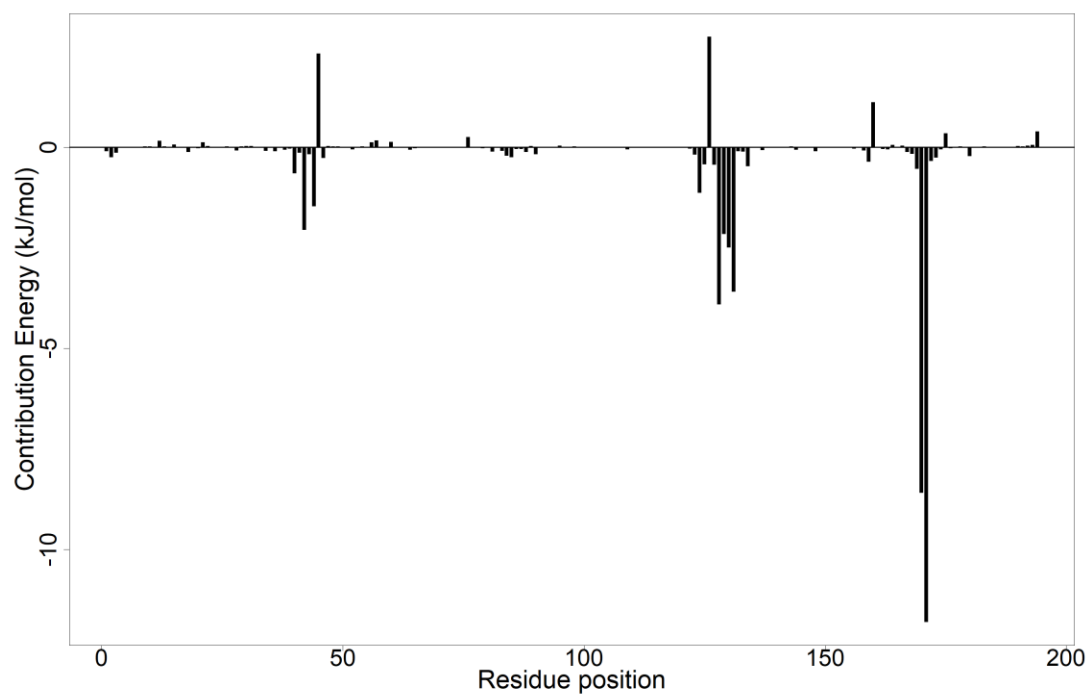

(f)

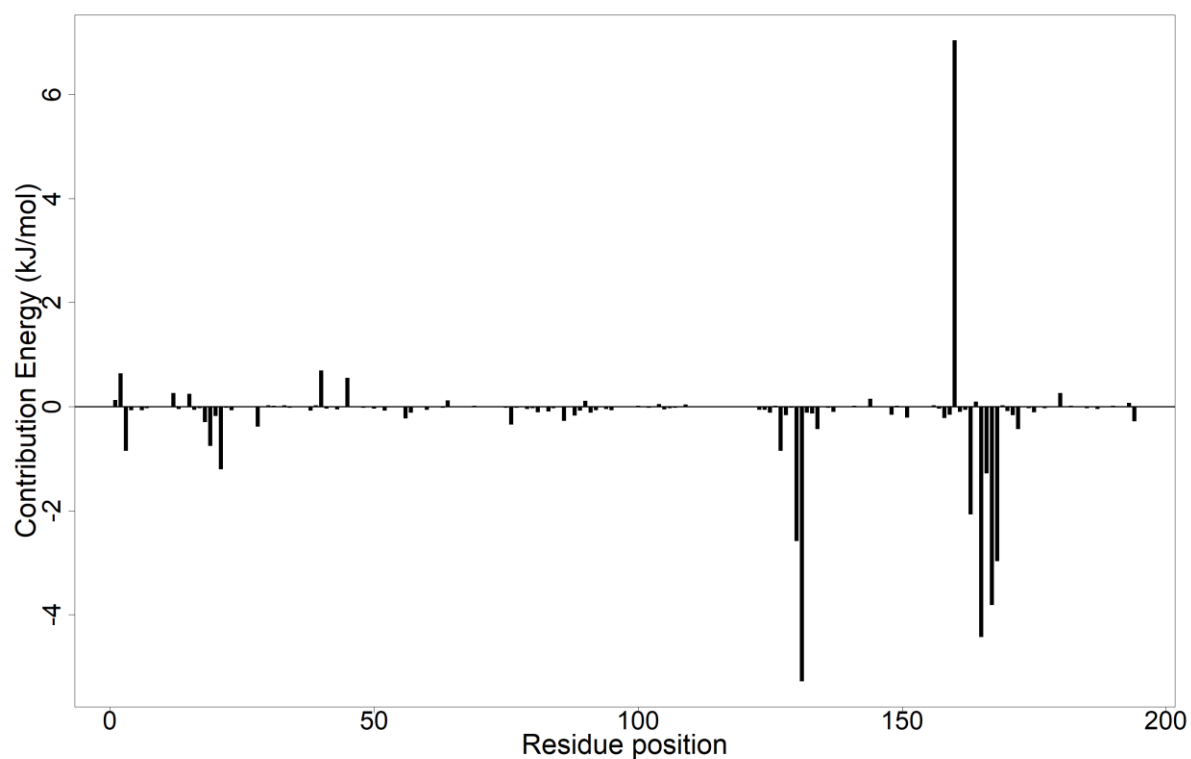

(g)

**Figure S5.** Per-residue energy decomposition plots of the various complexes showing the energy contributions of each amino acid residue for (a) VP40-nilotinib, (b) VP40-ZINC000034518176, (c) VP40-ZINC000095485942, (d) VP40-ZINC000085531689, (e) VP40-ZINC000014089759, (f) VP40-ZINC000085568136, and (g) VP40-ZINC000095912717 complexes.
